# Supplementary material for: Anithiactin D, a Phenylthiazole Natural Product from Mudflat-Derived Streptomyces sp., Suppresses Motility of Cancer Cells
Source: MDPI journal article supplement (doi:10.3390/md22020088), 2024-02-14

*Supporting Information*

# **Anithiactin D, a Phenylthiazole Natural Product from Mudflat-Derived *Streptomyces* sp., Suppresses Motility of Cancer Cells**

Sultan Pulat <sup>1,†</sup>, Inho Yang <sup>2,†</sup>, Jihye Lee <sup>3,4,†</sup>, Sunghoon Hwang <sup>5</sup>, Rui Zhou <sup>1</sup>, Chathurika D. B. Gamage <sup>1</sup>, Mücahit Varlı <sup>1</sup>, İsa Taş <sup>1</sup>, Yi Yang <sup>1</sup>, So-Yeon Park <sup>1</sup>, Areum Hong <sup>4</sup>, Jeong-Hyeon Kim <sup>4</sup>, Dong-Chan Oh <sup>5</sup>, Hangun Kim <sup>1,\*</sup>, Sang-Jip Nam <sup>4,\*</sup> and Heonjoong Kang <sup>6,\*</sup>

## List of Contents

|                                                                                                                      |           |
|----------------------------------------------------------------------------------------------------------------------|-----------|
| <b>Figure S1.</b> $^1\text{H}$ NMR spectrum (700 MHz, $\text{CD}_3\text{OD}$ ) of anthiactin D ( <b>1</b> ) .....    | <b>S2</b> |
| <b>Figure S2.</b> $^{13}\text{C}$ NMR spectrum (175 MHz, $\text{CD}_3\text{OD}$ ) of anthiactin D ( <b>1</b> ) ..... | <b>S3</b> |
| <b>Figure S3.</b> COSY spectrum (700 MHz, $\text{CD}_3\text{OD}$ ) of anthiactin D ( <b>1</b> ) .....                | <b>S4</b> |
| <b>Figure S4.</b> HSQC spectrum (700 MHz, $\text{CD}_3\text{OD}$ ) of anthiactin D ( <b>1</b> ) .....                | <b>S5</b> |
| <b>Figure S5.</b> HMBC spectrum (700 MHz, $\text{CD}_3\text{OD}$ ) of anthiactin D ( <b>1</b> ) .....                | <b>S6</b> |
| <b>Figure S6.</b> Comparing ECD spectrum with conformational search models of anthiactin D ( <b>1</b> ).....         | <b>S7</b> |

**Figure S1.**  $^1\text{H}$  NMR spectrum (700 MHz,  $\text{CD}_3\text{OD}$ ) of anthiactin D (**1**)

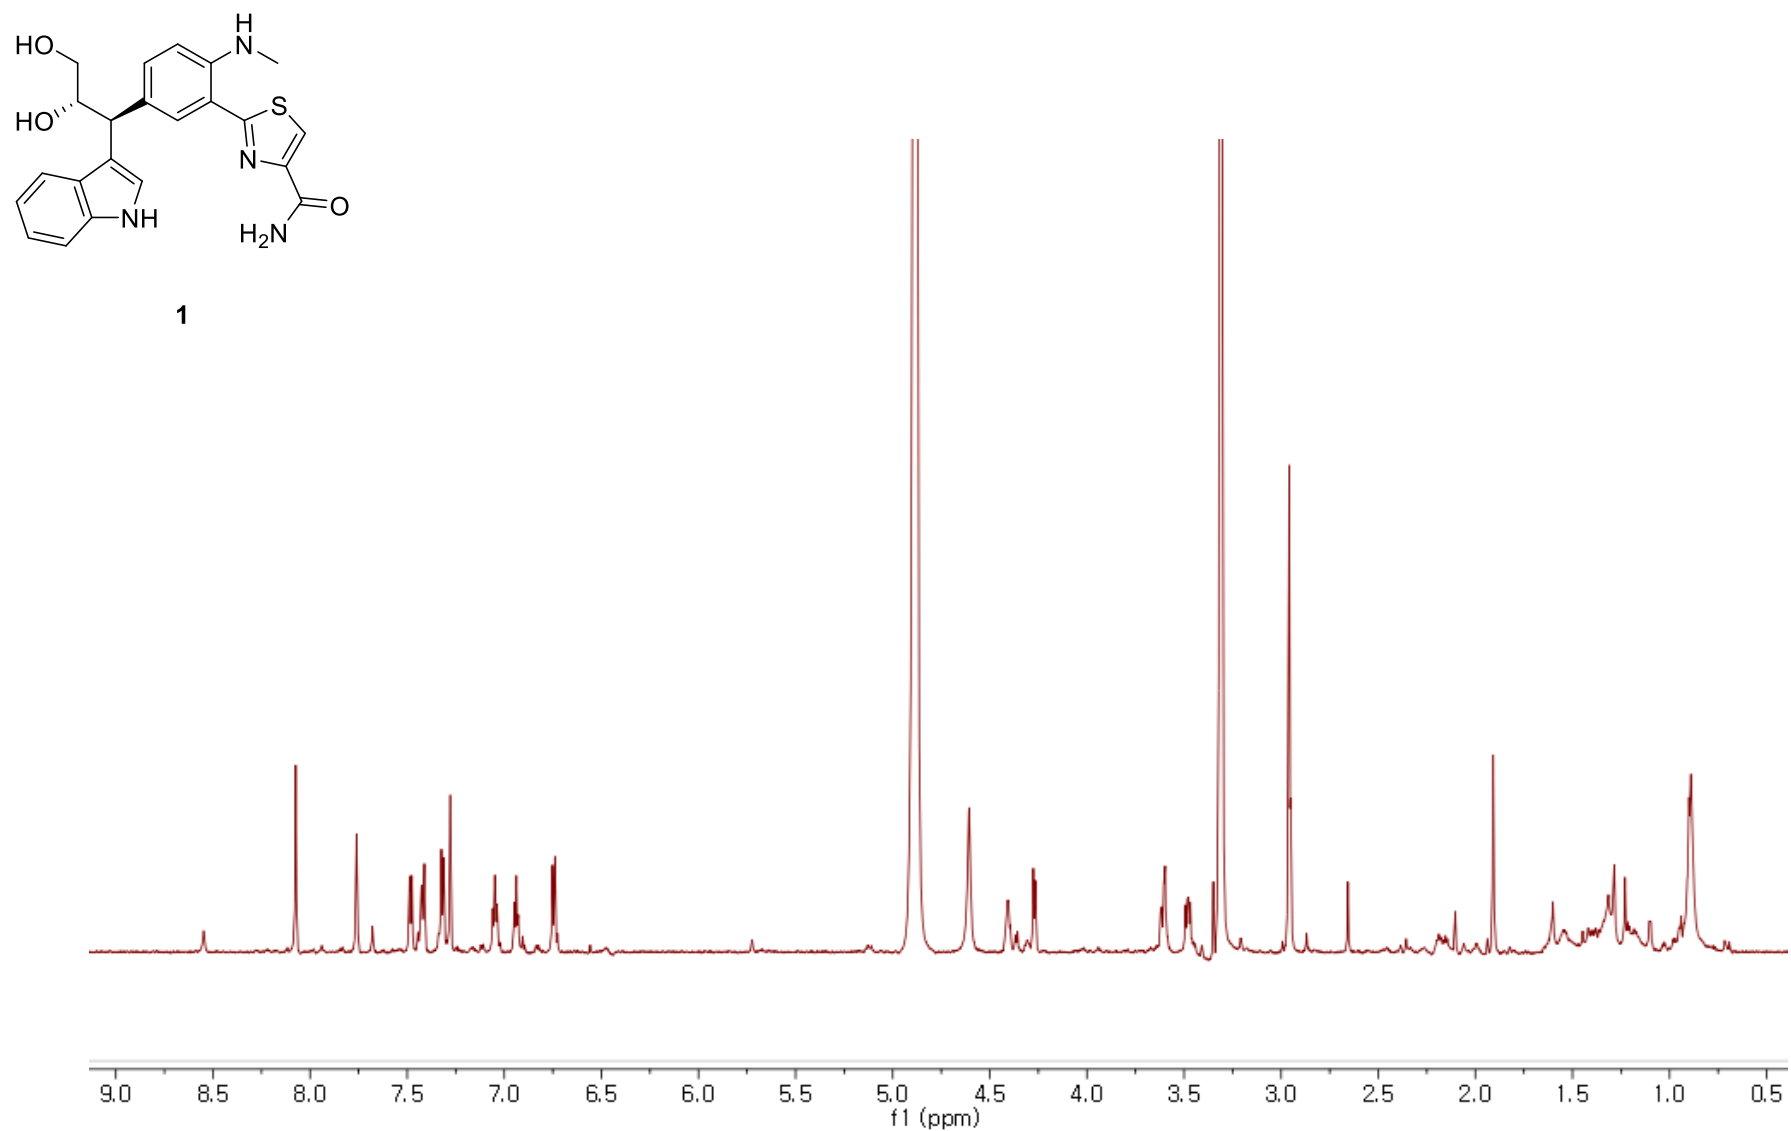

**Figure S2.**  $^{13}\text{C}$  NMR spectrum NMR Spectrum ( $\text{CD}_3\text{OD}$ , 175 MHz) of anithiactin D (**1**)

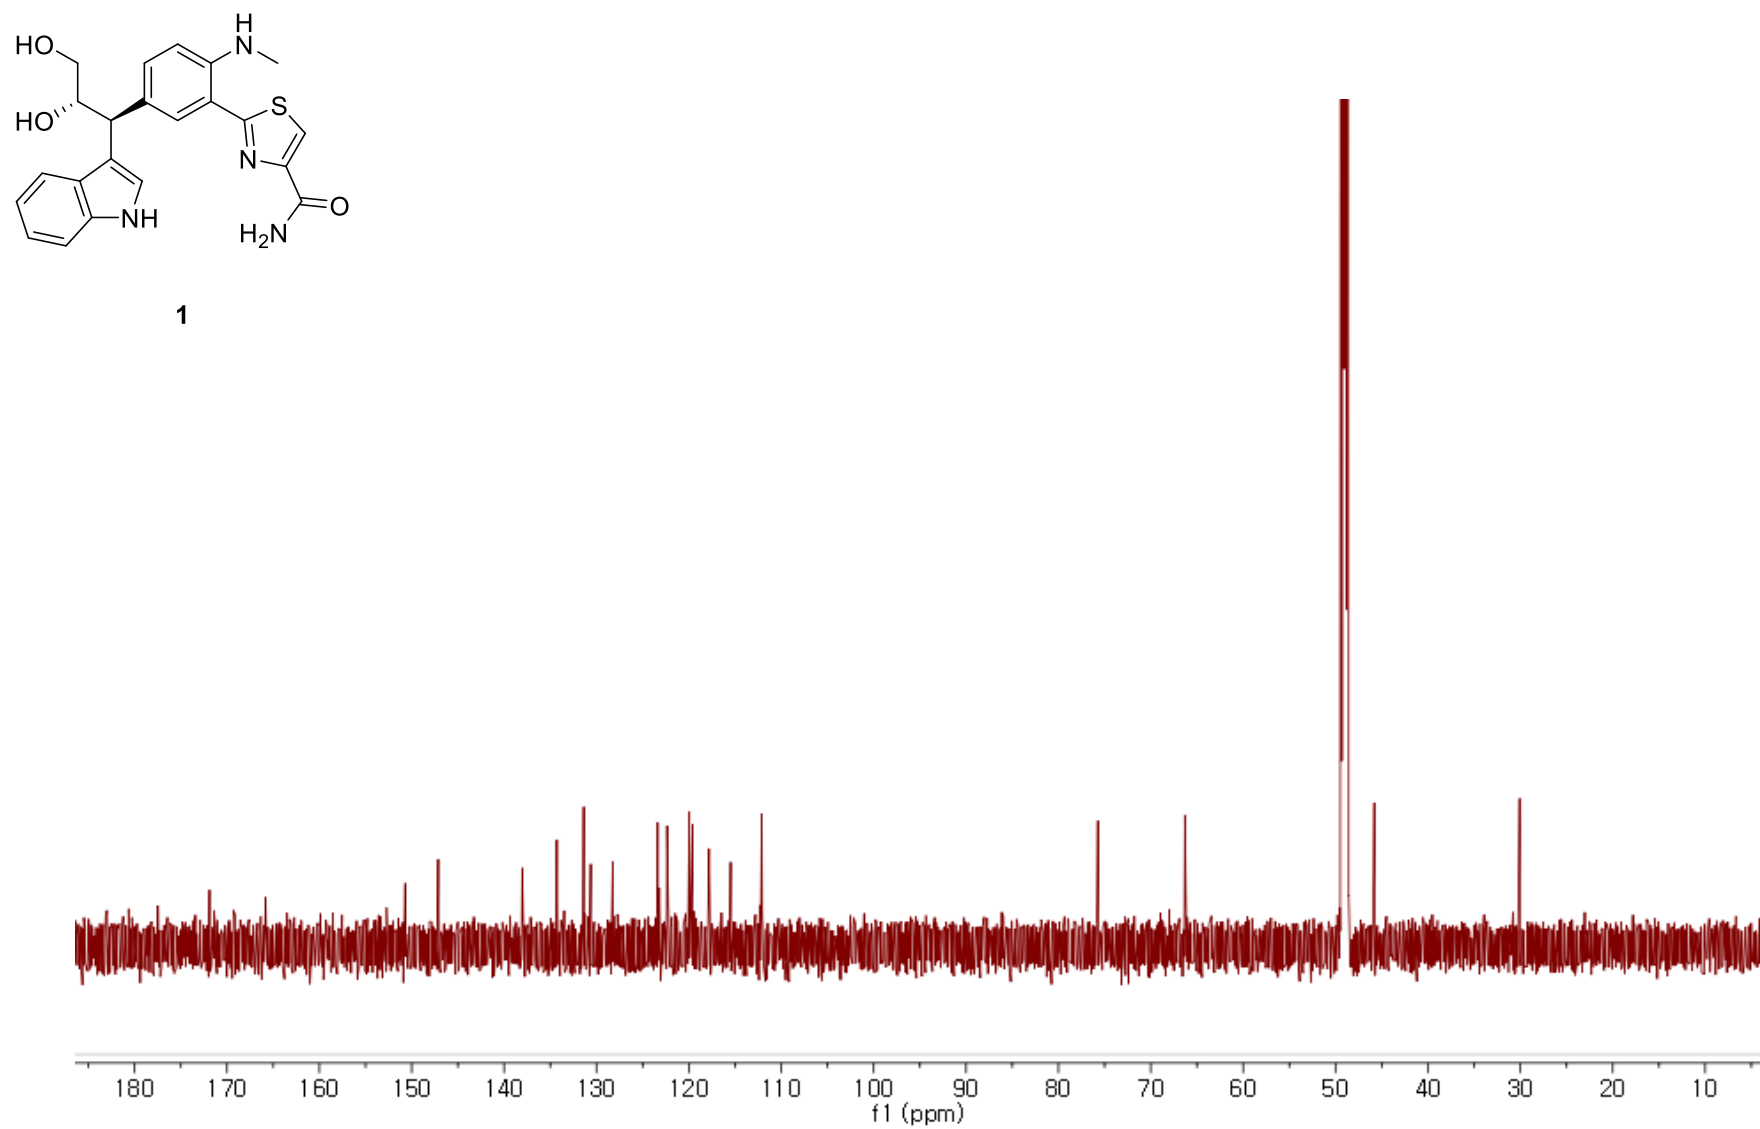

**Figure S3.** COSY NMR Spectrum (CD<sub>3</sub>OD, 700 MHz) of anithiactin D (**1**)

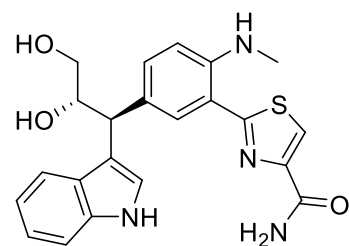

**1**

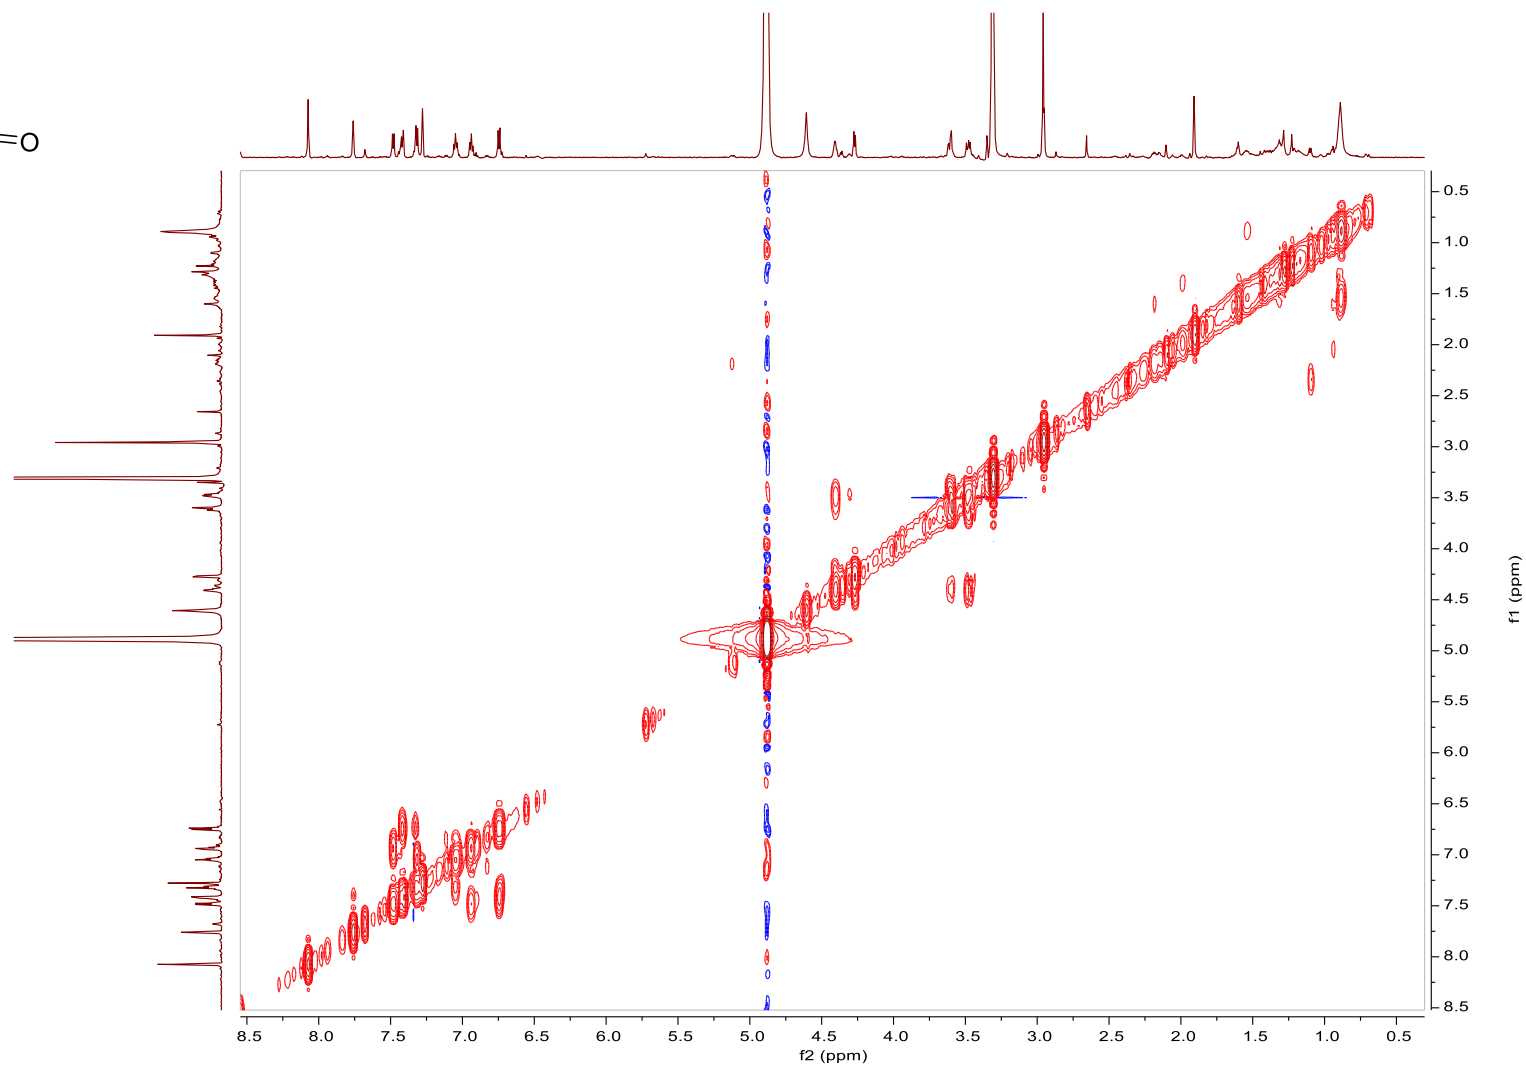

**Figure S4.** HSQC NMR Spectrum (CD<sub>3</sub>OD, 700 MHz) of anithiactin D (**1**)

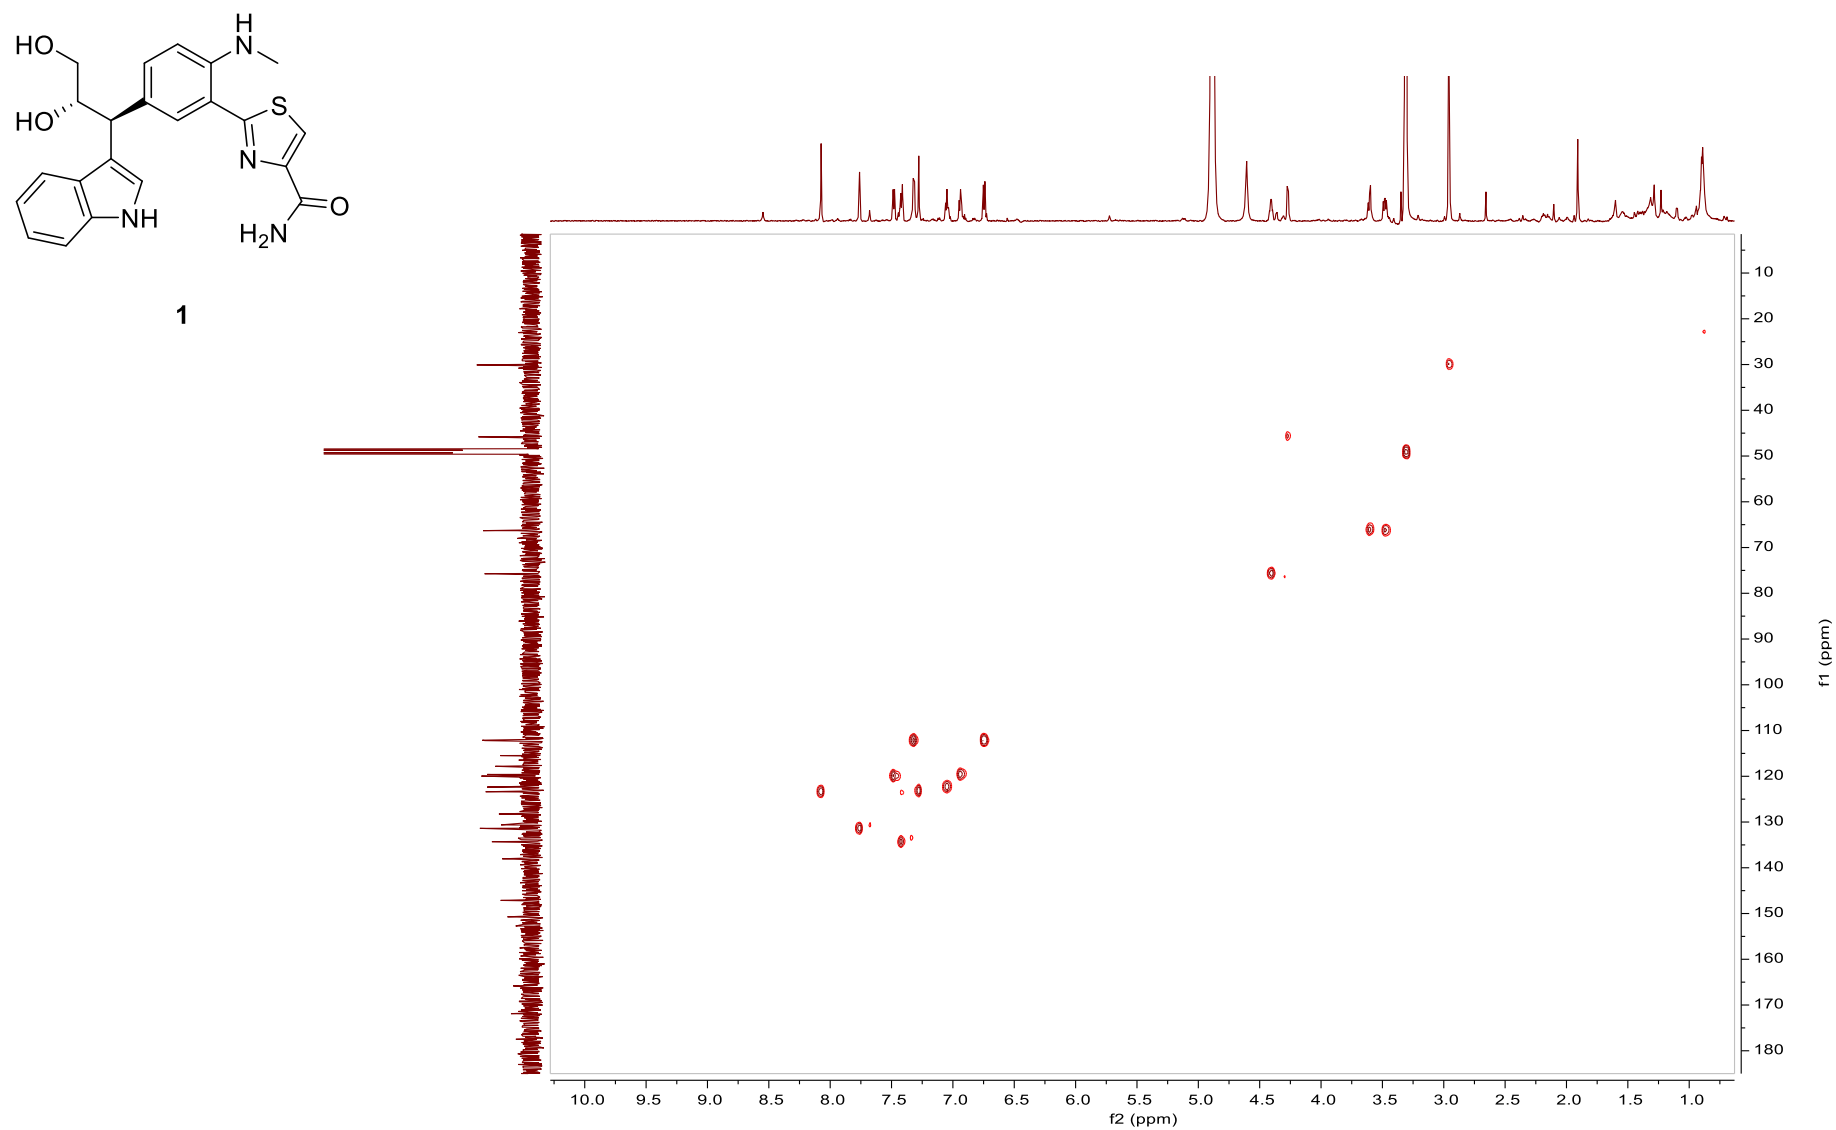

**Figure S5.** HMBC NMR Spectrum (CD<sub>3</sub>OD, 700 MHz) of anithiactin D (**1**)

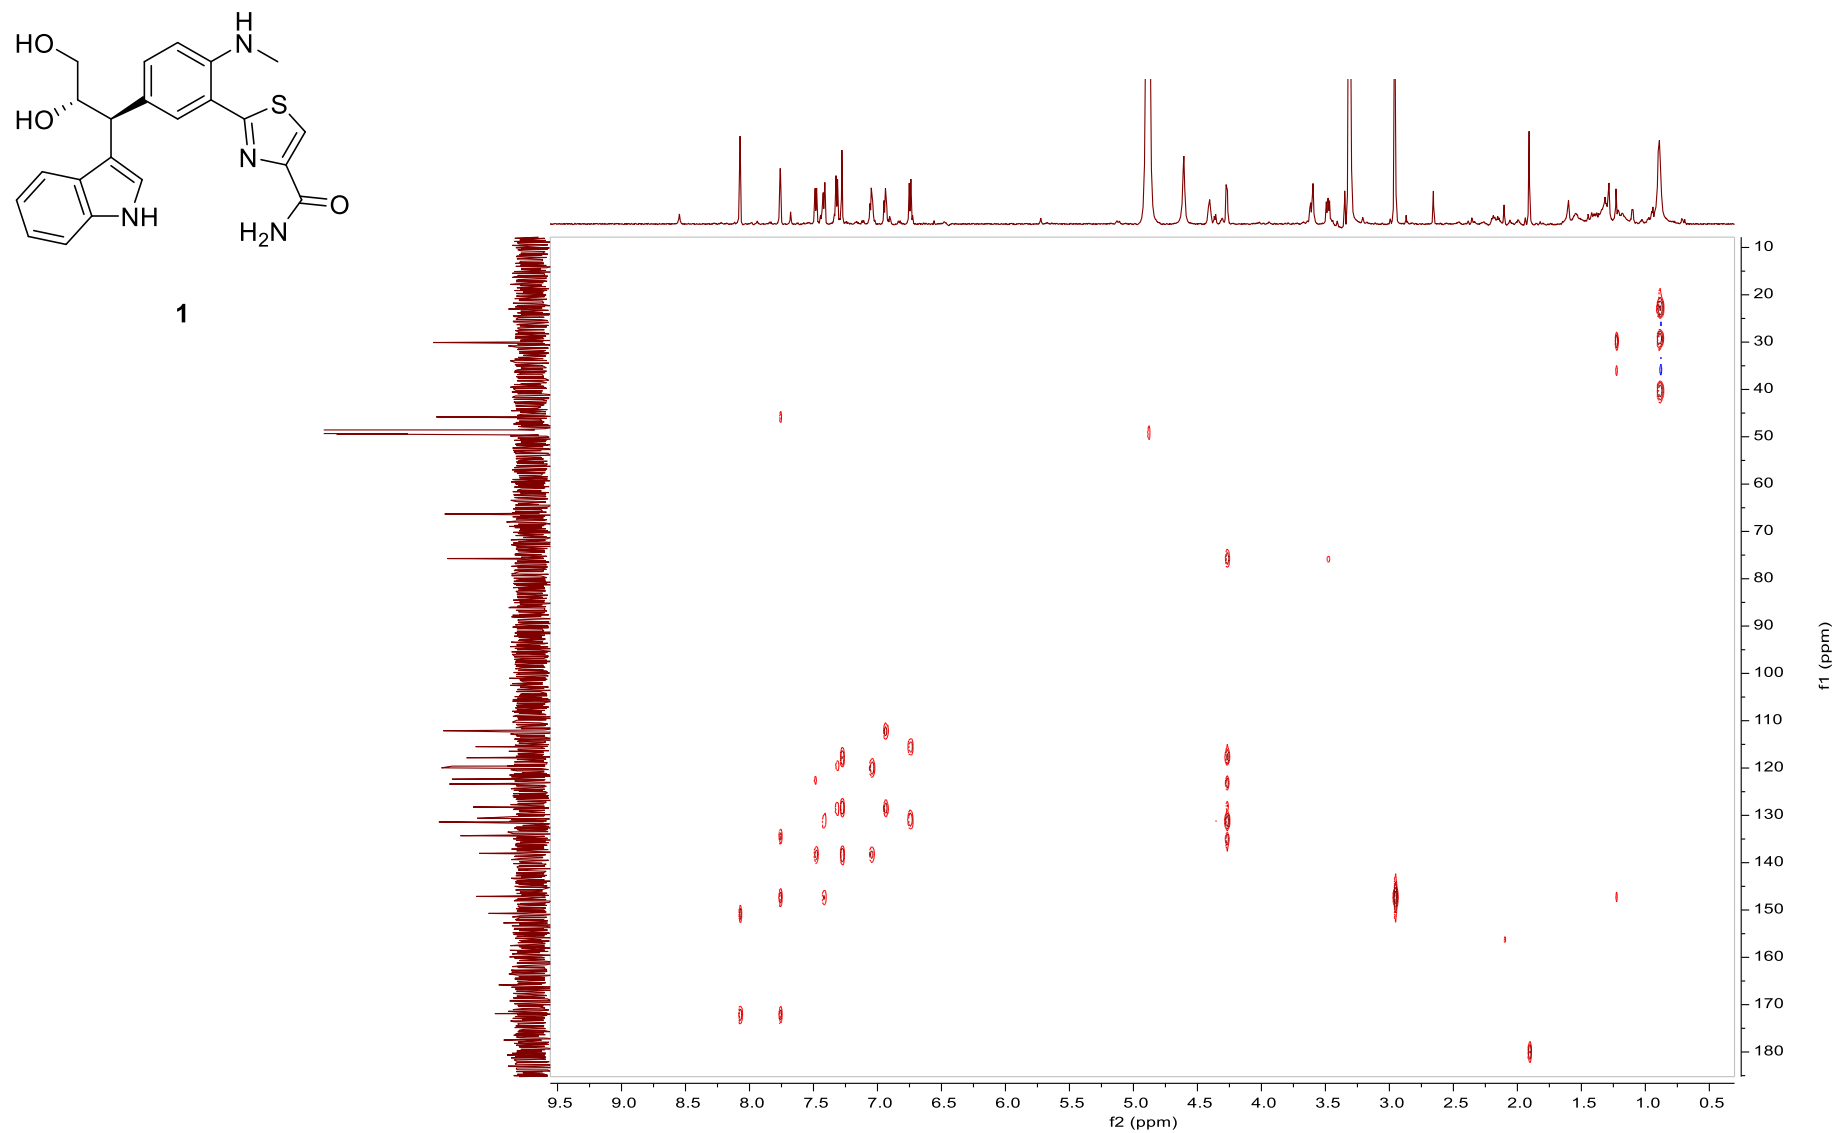

**Figure S6.** Comparing ECD spectrum with conformational search models of anthiactin D (**1**)

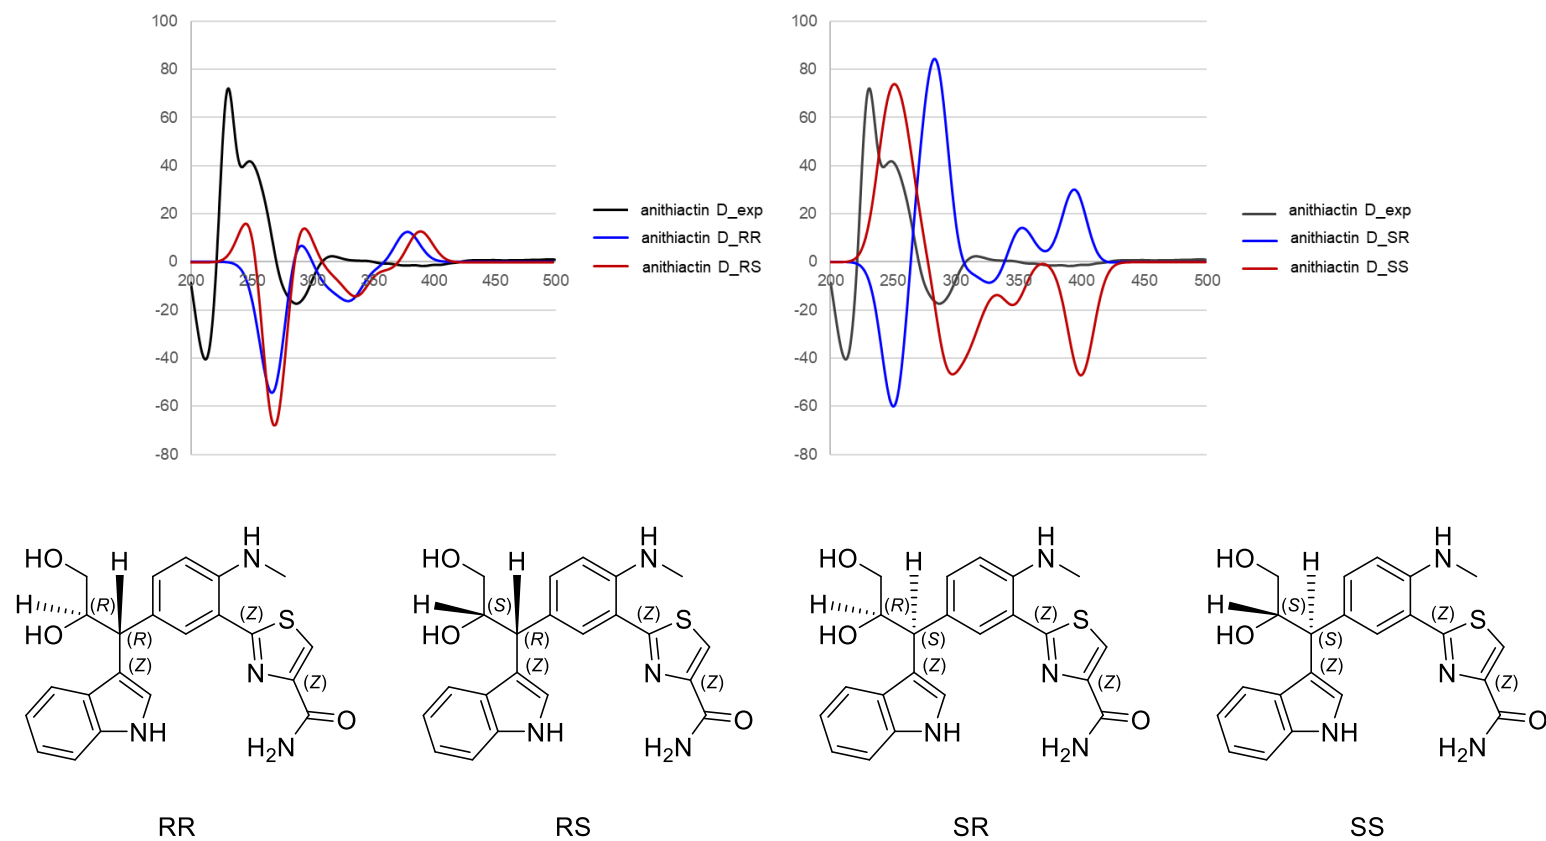

Supplement: s1 [file s1]
